# Supplementary material for: Comparative Transcriptome Analysis of Shiga Toxin-Producing Escherichia coli O157:H7 on Bovine Rectoanal Junction Cells and Human Colonic Epithelial Cells during Initial Adherence
Source: MDPI journal article supplement (doi:10.3390/microorganisms11102562), 2023-10-15
Supplement: s1 [file s1]

| Upregulated genes of <i>E. coli</i> O157:H7 during adherence to CCD CoN 841 cells        |                   |           |                                                                                                                  |
|------------------------------------------------------------------------------------------|-------------------|-----------|------------------------------------------------------------------------------------------------------------------|
| Symbol                                                                                   | FC on CCD CoN 841 | FC on RAJ | Biological Function                                                                                              |
| <i>aidB</i>                                                                              | 2.97              | -2.05     | cellular response to DNA damage stimulus                                                                         |
| <i>dctR</i>                                                                              | 6.11              | -1.69     | acidic PH                                                                                                        |
| <i>gadA</i>                                                                              | 2.10              | -1.37     | carboxylic acid metabolic process                                                                                |
| <i>hutW</i>                                                                              | 7.97              | -7.80     | Unknown                                                                                                          |
| <i>hutX</i>                                                                              | 11.87             | -19.59    | Unknown                                                                                                          |
| <i>iha_1</i>                                                                             | 1.97              | -6.37     | Unknown                                                                                                          |
| <i>iha_2</i>                                                                             | 1.85              | -7.69     | Unknown                                                                                                          |
| <i>mntH</i>                                                                              | 4.25              | -2.74     | cadmium ion transmembrane transport                                                                              |
| <i>nrdE</i>                                                                              | 4.61              | -4.96     | deoxyribonucleotide biosynthetic process                                                                         |
| <i>nrdF</i>                                                                              | 5.11              | -10.06    | deoxyribonucleotide biosynthetic process                                                                         |
| <i>nrdI</i>                                                                              | 5.40              | -5.80     | protein modification process                                                                                     |
| <i>pqqL</i>                                                                              | 5.24              | -2.54     | Proteolysis                                                                                                      |
| <i>shiA</i>                                                                              | 4.12              | -1.85     | shikimate transport                                                                                              |
| <i>sufB</i>                                                                              | 2.07              | -2.03     | iron-sulfur cluster assembly                                                                                     |
| <i>sufC</i>                                                                              | 2.40              | -2.28     | iron-sulfur cluster assembly                                                                                     |
| <i>tdcB</i>                                                                              | 7.26              | -1.97     | L-serine catabolic process                                                                                       |
| <i>wzz(fepE)</i>                                                                         | 3.41              | -6.85     | Unknown                                                                                                          |
| <i>yddA</i>                                                                              | 5.13              | -2.93     | transmembrane transport                                                                                          |
| <i>yddB</i>                                                                              | 4.42              | -2.46     | iron coordination entity transport                                                                               |
| <i>yegP</i>                                                                              | 4.50              | -1.94     | double-strand break repair                                                                                       |
| <i>yjjZ</i>                                                                              | 6.23              | -4.09     | Unknown                                                                                                          |
| <i>yncE</i>                                                                              | 5.95              | -5.49     | DNA binding proten (outer membrane)                                                                              |
| Uniquely expressed genes of <i>E. coli</i> O157:H7 during adherence to CCD CoN 841 cells |                   |           |                                                                                                                  |
| <i>adhE</i>                                                                              | 9.10              | 0.00      | Glycolysis                                                                                                       |
| <i>cpdB</i>                                                                              | 2.03              | 0.00      | cellular response to DNA damage stimulus                                                                         |
| <i>fsa_1</i>                                                                             | 9.02              | 0.00      | Unknown                                                                                                          |
| <i>gcvT</i>                                                                              | 1.80              | 0.00      | glycine catabolic process                                                                                        |
| <i>glgS</i>                                                                              | 3.10              | 0.00      | negative regulation of bacterial-type flagellum-dependent cell motility/negative regulation of biofilm formation |
| <i>gpmA</i>                                                                              | 5.51              | 0.00      | Glycolysis                                                                                                       |
| <i>kch</i>                                                                               | 1.88              | 0.00      | ion transport                                                                                                    |
| <i>metE</i>                                                                              | 6.89              | 0.00      | cellular amino acid biosynthetic process                                                                         |
| <i>minD</i>                                                                              | 1.85              | 0.00      | barrier septum assembly                                                                                          |
| <i>nrdH</i>                                                                              | 5.04              | 0.00      | cell redox homeostasis                                                                                           |
| <i>raiA</i>                                                                              | 2.05              | 0.00      | dormancy process                                                                                                 |
| <i>rmf</i>                                                                               | 2.04              | 0.00      | dormancy process                                                                                                 |
| <i>tdcA</i>                                                                              | 6.84              | 0.00      | L-threonine catabolic process to propionate                                                                      |
| <i>uspF</i>                                                                              | 3.95              | 0.00      | cell adhesion                                                                                                    |
| <i>ybaT</i>                                                                              | 2.42              | 0.00      | response to pH                                                                                                   |
| <i>ybiI</i>                                                                              | 4.24              | 0.00      | positive regulation of secondary metabolite biosynthetic process                                                 |
| <i>yciI</i>                                                                              | 3.26              | 0.00      | Unknown                                                                                                          |
| <i>yeaG</i>                                                                              | 2.47              | 0.00      | cellular response to nitrogen starvation                                                                         |
| <i>yeaH</i>                                                                              | 2.66              | 0.00      | Unknown                                                                                                          |
| <i>ygeV</i>                                                                              | 3.06              | 0.00      | Unknown                                                                                                          |
| <i>yobF</i>                                                                              | 1.82              | 0.00      | cellular response to cell envelope stress                                                                        |
| <i>ytfT</i>                                                                              | 3.94              | 0.00      | carbohydrate transport                                                                                           |
| Upregulated genes of <i>E. coli</i> O157:H7 during adherence to RAJ cells                |                   |           |                                                                                                                  |
| <i>eutS</i>                                                                              | -1.29             | 8.29      | ethanolamine catabolic process                                                                                   |
| <i>sodB</i>                                                                              | -1.09             | 6.66      | cellular response to chemical stimulus                                                                           |
| <i>pta_2</i>                                                                             | -1.20             | 5.06      | Unknown                                                                                                          |
| <i>emrK</i>                                                                              | -1.00             | 4.91      | drug transmembrane export/ response to antibiotic                                                                |

|               |       |      |                                                                  |
|---------------|-------|------|------------------------------------------------------------------|
| <i>eutE</i>   | -1.99 | 4.04 | Unknown                                                          |
| <i>eutQ</i>   | -1.24 | 3.86 | ethanolamine catabolic process                                   |
| <i>narK</i>   | -1.19 | 3.82 | nitrate assimilation / transmembrane transport                   |
| <i>yfcC</i>   | -1.08 | 3.78 | transmembrane transport                                          |
| <i>eutM</i>   | -2.32 | 3.53 | ethanolamine catabolic process                                   |
| <i>ynfH</i>   | -1.42 | 3.05 | anaerobic electron transport chain                               |
| <i>napF</i>   | -1.02 | 2.99 | response to oxidative stress                                     |
| <i>eutG</i>   | -1.53 | 2.97 | alcohol dehydrogenase (NAD) activity                             |
| <i>eutC</i>   | -1.20 | 2.92 | ethanolamine catabolic process                                   |
| <i>cesD</i>   | -1.22 | 2.74 | Unknown                                                          |
| <i>ynjE</i>   | -1.24 | 2.65 | Unknown                                                          |
| <i>eutB</i>   | -1.49 | 2.54 | ethanolamine catabolic process                                   |
| <i>eutK</i>   | -1.34 | 2.40 | ethanolamine catabolic process                                   |
| <i>eutL</i>   | -1.36 | 2.40 | ethanolamine catabolic process                                   |
| <i>fldA</i>   | -1.02 | 2.34 | electron transport chain                                         |
| <i>eutT</i>   | -2.31 | 2.33 | ethanolamine catabolic process                                   |
| <i>suhB</i>   | -1.49 | 2.33 | inositol metabolic process/ phosphatidylinositol phosphorylation |
| <i>cesD2</i>  | -1.22 | 2.31 | Unknown                                                          |
| <i>nrfE</i>   | -1.01 | 2.31 | cytochrome c-heme linkage via heme-L-cysteine                    |
| <i>eutH</i>   | -1.13 | 2.27 | ethanolamine catabolic process                                   |
| <i>fumB_2</i> | -1.44 | 2.25 | Unknown                                                          |
| <i>nrfG</i>   | -1.21 | 2.14 | cytochrome c-heme linkage via heme-L-cysteine                    |

---

**Uniquely expressed genes of *E. coli* O157:H7 during adherence to RAJ cells**

---

|               |      |       |                                                                |
|---------------|------|-------|----------------------------------------------------------------|
| <i>abrB</i>   | 0.00 | 2.18  | regulation of gene expression                                  |
| <i>accA</i>   | 0.00 | 1.46  | fatty acid biosynthetic process                                |
| <i>accD</i>   | 0.00 | 1.99  | fatty acid biosynthetic process                                |
| <i>acrA</i>   | 0.00 | 1.53  | response to toxic substance                                    |
| <i>adiA</i>   | 0.00 | 3.09  | arginine catabolic process                                     |
| <i>aegA</i>   | 0.00 | 2.67  | urate catabolic process                                        |
| <i>allR</i>   | 0.00 | 1.73  | cellular response to DNA damage stimulus                       |
| <i>amiD</i>   | 0.00 | 1.61  | cell wall organization/peptidoglycan catabolic process )       |
| <i>apbE</i>   | 0.00 | 1.53  | protein flavinylation                                          |
| <i>cpoB</i>   | 0.00 | 1.62  | FtsZ-dependent cytokinesis                                     |
| <i>cueO</i>   | 0.00 | 1.57  | detoxification of copper ion                                   |
| <i>cvpA</i>   | 0.00 | 2.16  | toxin biosynthetic process                                     |
| <i>cyaY</i>   | 0.00 | 3.26  | iron-sulfur cluster assembly                                   |
| <i>cybB</i>   | 0.00 | 1.49  | removal of superoxide radicals                                 |
| <i>dinF</i>   | 0.00 | 1.45  | transmembrane transport /xenobiotic transport                  |
| <i>dmsB_1</i> | 0.00 | 6.25  | Unknown                                                        |
| <i>dmsB_2</i> | 0.00 | 9.29  | Unknown                                                        |
| <i>dtpD</i>   | 0.00 | 1.80  | dipeptide transmembrane transport                              |
| <i>ecpR</i>   | 0.00 | 2.37  | regulation of bacterial-type flagellum-dependent cell motility |
| <i>elaA</i>   | 0.00 | 2.18  | UDP-N-acetylglucosamine biosynthetic process                   |
| <i>emrA</i>   | 0.00 | 1.55  | drug transmembrane export/response to toxic substance          |
| <i>emrK</i>   | 0.00 | 4.91  | drug transmembrane export/response to toxic substance          |
| <i>emrR</i>   | 0.00 | 1.60  | Unknown                                                        |
| <i>epmA</i>   | 0.00 | 2.97  | cellular response to acidic pH                                 |
| <i>eutA</i>   | 0.00 | 2.49  | ethanolamine catabolic process                                 |
| <i>eutE</i>   | 0.00 | 4.04  | ethanolamine catabolic process                                 |
| <i>eutJ</i>   | 0.00 | 10.93 | ethanolamine catabolic process                                 |
| <i>eutP</i>   | 0.00 | 9.11  | ethanolamine catabolic process                                 |
| <i>fetA</i>   | 0.00 | 2.40  | cellular iron ion homeostasis                                  |
| <i>fetB</i>   | 0.00 | 2.71  | cellular iron ion homeostasis                                  |

|               |      |       |                                                                    |
|---------------|------|-------|--------------------------------------------------------------------|
| <i>ftnA</i>   | 0.00 | 8.45  | cellular iron ion homeostasis                                      |
| <i>fur</i>    | 0.00 | 1.53  | negative regulation of siderophore biosynthetic process            |
| <i>glxR</i>   | 0.00 | 3.81  | allantoin assimilation pathway                                     |
| <i>grlA</i>   | 0.00 | 2.30  | Unknown                                                            |
| <i>grlR</i>   | 0.00 | 3.07  | Unknown                                                            |
| <i>grxA</i>   | 0.00 | 8.87  | cellular response to oxidative stress                              |
| <i>grxD</i>   | 0.00 | 2.56  | cellular response to oxidative stress                              |
| <i>gsiD</i>   | 0.00 | 1.51  | dipeptide transmembrane transport                                  |
| <i>gspL</i>   | 0.00 | 1.46  | protein secretion by the type II secretion system                  |
| <i>gstA</i>   | 0.00 | 1.61  | response to hydrogen peroxide                                      |
| <i>hslJ</i>   | 0.00 | 2.33  | response to heat                                                   |
| <i>iraD</i>   | 0.00 | 13.90 | cellular response to oxidative stress                              |
| <i>kdpC</i>   | 0.00 | 3.25  | potassium ion transport                                            |
| <i>lacY</i>   | 0.00 | 2.17  | carbohydrate transmembrane transport                               |
| <i>lolB</i>   | 0.00 | 1.75  | lipoprotein localization to outer membrane                         |
| <i>lpxA</i>   | 0.00 | 1.87  | lipid A biosynthetic process                                       |
| <i>lpxC</i>   | 0.00 | 1.57  | lipid A biosynthetic process                                       |
| <i>lpxD</i>   | 0.00 | 1.47  | lipid A biosynthetic process                                       |
| <i>marB</i>   | 0.00 | 3.34  | OMP/cellular response to antibiotics                               |
| <i>marR</i>   | 0.00 | 1.83  | OMP/cellular response to antibiotics                               |
| <i>menB</i>   | 0.00 | 2.65  | menaquinone biosynthetic process                                   |
| <i>menC</i>   | 0.00 | 2.38  | menaquinone biosynthetic process                                   |
| <i>menD</i>   | 0.00 | 1.53  | menaquinone biosynthetic process                                   |
| <i>menE</i>   | 0.00 | 1.64  | menaquinone biosynthetic process                                   |
| <i>menI</i>   | 0.00 | 1.78  | menaquinone biosynthetic process                                   |
| <i>mipA</i>   | 0.00 | 2.18  | peptidoglycan biosynthetic process                                 |
| <i>mlaA</i>   | 0.00 | 1.55  | phospholipid transport                                             |
| <i>mlaB</i>   | 0.00 | 1.55  | phospholipid transport                                             |
| <i>mlaC</i>   | 0.00 | 1.53  | phospholipid transport                                             |
| <i>modE</i>   | 0.00 | 1.76  | molybdate ion transport                                            |
| <i>mrcB</i>   | 0.00 | 1.54  | cell wall organization /cell wall repair                           |
| <i>murA</i>   | 0.00 | 1.47  | UDP-N-acetylgalactosamine biosynthetic process                     |
| <i>murI</i>   | 0.00 | 1.90  | cell wall organization                                             |
| <i>narH_1</i> | 0.00 | 3.04  | unknown                                                            |
| <i>narI_1</i> | 0.00 | 4.17  | unknown                                                            |
| <i>narJ</i>   | 0.00 | 3.17  | chaperone-mediated protein complex assembly / nitrate assimilation |
| <i>narK</i>   | 0.00 | 3.82  | nitrate assimilation                                               |
| <i>nikB</i>   | 0.00 | 2.40  | dipeptide transmembrane transport                                  |
| <i>nikC</i>   | 0.00 | 2.08  | dipeptide transmembrane transport                                  |
| <i>nikD</i>   | 0.00 | 4.06  | dipeptide transmembrane transport                                  |
| <i>nikE</i>   | 0.00 | 2.00  | nickel cation transport                                            |
| <i>ompA</i>   | 0.00 | 1.87  | ion transmembrane transport                                        |
| <i>ompR</i>   | 0.00 | 1.73  | phosphorelay signal transduction system                            |
| <i>oppA</i>   | 0.00 | 1.54  | oligopeptide transport                                             |
| <i>oppC</i>   | 0.00 | 1.49  | oligopeptide transport                                             |
| <i>oppD</i>   | 0.00 | 1.71  | oligopeptide transport                                             |
| <i>oppF</i>   | 0.00 | 1.81  | oligopeptide transport                                             |
| <i>pgaD</i>   | 0.00 | 2.08  | cell adhesion involved in biofilm formation                        |
| <i>pgsA</i>   | 0.00 | 1.60  | glycerophospholipid biosynthetic process                           |
| <i>potD</i>   | 0.00 | 1.59  | polyamine transport                                                |
| <i>potE</i>   | 0.00 | 8.92  | L-ornithine transmembrane transport                                |
| <i>preA</i>   | 0.00 | 2.00  | bacterial-type flagellum-dependent swarming motility               |
| <i>pta_2</i>  | 0.00 | 5.06  | unknown                                                            |

|               |      |       |                                                                         |
|---------------|------|-------|-------------------------------------------------------------------------|
| <i>rclA</i>   | 0.00 | 3.35  | response to hypochlorite                                                |
| <i>rcnB</i>   | 0.00 | 1.66  | cellular response to DNA damage stimulus                                |
| <i>rcsB</i>   | 0.00 | 1.49  | cellular stress response to acidic pH                                   |
| <i>rfaC</i>   | 0.00 | 1.63  | lipopolysaccharide biosynthetic process                                 |
| <i>rfaD</i>   | 0.00 | 2.14  | lipopolysaccharide biosynthetic process                                 |
| <i>rfaF</i>   | 0.00 | 1.78  | lipopolysaccharide biosynthetic process                                 |
| <i>rfaL</i>   | 0.00 | 1.78  | lipopolysaccharide biosynthetic process                                 |
| <i>rfaY</i>   | 0.00 | 1.50  | lipopolysaccharide biosynthetic process                                 |
| <i>skp</i>    | 0.00 | 2.10  | Gram-negative-bacterium-type cell outer membrane assembly               |
| <i>slmA</i>   | 0.00 | 1.46  | barrier septum site selection                                           |
| <i>slyB</i>   | 0.00 | 1.48  | Outer membrane lipoprotein                                              |
| <i>sodB</i>   | 0.00 | 6.66  | removal of superoxide radicals                                          |
| <i>sodC_3</i> | 0.00 | 2.05  | unknown                                                                 |
| <i>sorE</i>   | 0.00 | 2.32  | unknown                                                                 |
| <i>stpA</i>   | 0.00 | 10.12 | negative regulation of transcription                                    |
| <i>tatA</i>   | 0.00 | 1.54  | protein transport by the Tat complex                                    |
| <i>tatE</i>   | 0.00 | 2.26  | protein transport by the Tat complex                                    |
| <i>tolB</i>   | 0.00 | 1.61  | bacteriocin transport                                                   |
| <i>trkA</i>   | 0.00 | 1.46  | ion transport                                                           |
| <i>trxA</i>   | 0.00 | 2.65  | cell redox homeostasis                                                  |
| <i>trxB</i>   | 0.00 | 2.38  | cell redox homeostasis                                                  |
| <i>tyrP</i>   | 0.00 | 3.14  | amino acid transmembrane transport                                      |
| <i>ubiG</i>   | 0.00 | 1.69  | hyperosmotic salinity response                                          |
| <i>ureC_1</i> | 0.00 | 1.57  | unknown                                                                 |
| <i>ureC_2</i> | 0.00 | 1.53  | unknown                                                                 |
| <i>ureE_2</i> | 0.00 | 1.60  | unknown                                                                 |
| <i>ureG_1</i> | 0.00 | 2.39  | unknown                                                                 |
| <i>uvrD</i>   | 0.00 | 2.67  | unknown                                                                 |
| <i>wecG</i>   | 0.00 | 1.51  | enterobacterial common antigen biosynthetic process                     |
| <i>wzy</i>    | 0.00 | 1.54  | unknown                                                                 |
| <i>wzzB</i>   | 0.00 | 1.72  | lipopolysaccharide biosynthetic process                                 |
| <i>xanP</i>   | 0.00 | 3.45  | transmembrane transport                                                 |
| <i>yaaA</i>   | 0.00 | 1.70  | response to hydroperoxide                                               |
| <i>yajC</i>   | 0.00 | 1.53  | protein insertion into membrane from inner side                         |
| <i>ybdG</i>   | 0.00 | 1.71  | cellular response to osmotic stress                                     |
| <i>ybhS</i>   | 0.00 | 1.78  | drug transmembrane export                                               |
| <i>ycdX</i>   | 0.00 | 1.86  | bacterial-type flagellum-dependent swarming motility                    |
| <i>ychF</i>   | 0.00 | 2.36  | response to oxidative stress                                            |
| <i>yddG</i>   | 0.00 | 3.12  | amino acid export                                                       |
| <i>ydgA</i>   | 0.00 | 1.45  | bacterial-type flagellum-dependent swarming motility                    |
| <i>ydhL</i>   | 0.00 | 2.40  | response to hydrogen peroxide                                           |
| <i>ydiV</i>   | 0.00 | 1.53  | negative regulation of bacterial-type flagellum-dependent cell motility |
| <i>ydiY</i>   | 0.00 | 4.61  | unknown                                                                 |
| <i>yeaR</i>   | 0.00 | 4.18  | unknown                                                                 |
| <i>yebB</i>   | 0.00 | 3.25  | unknown                                                                 |
| <i>yecC</i>   | 0.00 | 2.09  | unknown                                                                 |
| <i>yecD</i>   | 0.00 | 2.09  | unknown                                                                 |
| <i>yedD</i>   | 0.00 | 2.48  | unknown                                                                 |
| <i>yfcC</i>   | 0.00 | 3.78  | transmembrane transport                                                 |
| <i>yfeH</i>   | 0.00 | 1.79  | transmembrane transport                                                 |
| <i>yfeX</i>   | 0.00 | 2.74  | cellular oxidant detoxification                                         |
| <i>yhcC</i>   | 0.00 | 3.69  | 4 iron, 4 sulfur cluster binding                                        |
| <i>yhcN</i>   | 0.00 | 2.71  | cellular response to acidic pH                                          |

|             |      |      |                                                      |
|-------------|------|------|------------------------------------------------------|
| <i>yiaF</i> | 0.00 | 1.55 | symbiosis, encompassing mutualism through parasitism |
| <i>yijE</i> | 0.00 | 2.20 | amino acid transmembrane transport                   |
| <i>yjbH</i> | 0.00 | 3.13 | extracellular polysaccharide biosynthetic process    |
| <i>yjdP</i> | 0.00 | 3.52 | unknown                                              |
| <i>yjiX</i> | 0.00 | 3.60 | cellular response to DNA damage stimulus             |
| <i>ynjD</i> | 0.00 | 1.94 | transmembrane transport                              |
| <i>yoaB</i> | 0.00 | 1.92 | single-species biofilm formation                     |
| <i>ypdA</i> | 0.00 | 1.83 | cell wall organization                               |
| <i>ytfB</i> | 0.00 | 1.66 | FtsZ-dependent cytokinesis                           |
| <i>ytfE</i> | 0.00 | 1.71 | iron incorporation into metallo-sulfur cluster       |

---
